# Supplementary material for: Improving waiting time and operational clinic flow in a tertiary diabetes center
Source: PubMed Central journal article supplement — BMJ Qual Improv Rep. 2014 Feb 5;2(2):u201918.w1006. doi: 10.1136/bmjquality.u201918.w1006 (PMC4663843; doi:10.1136/bmjquality.u201918.w1006), 2014-02-05

**Figure 2: The mean turn-around time (TAT) in minutes before and after the project implementation according to patient type. There was no difference in overall TAT before and after project.**

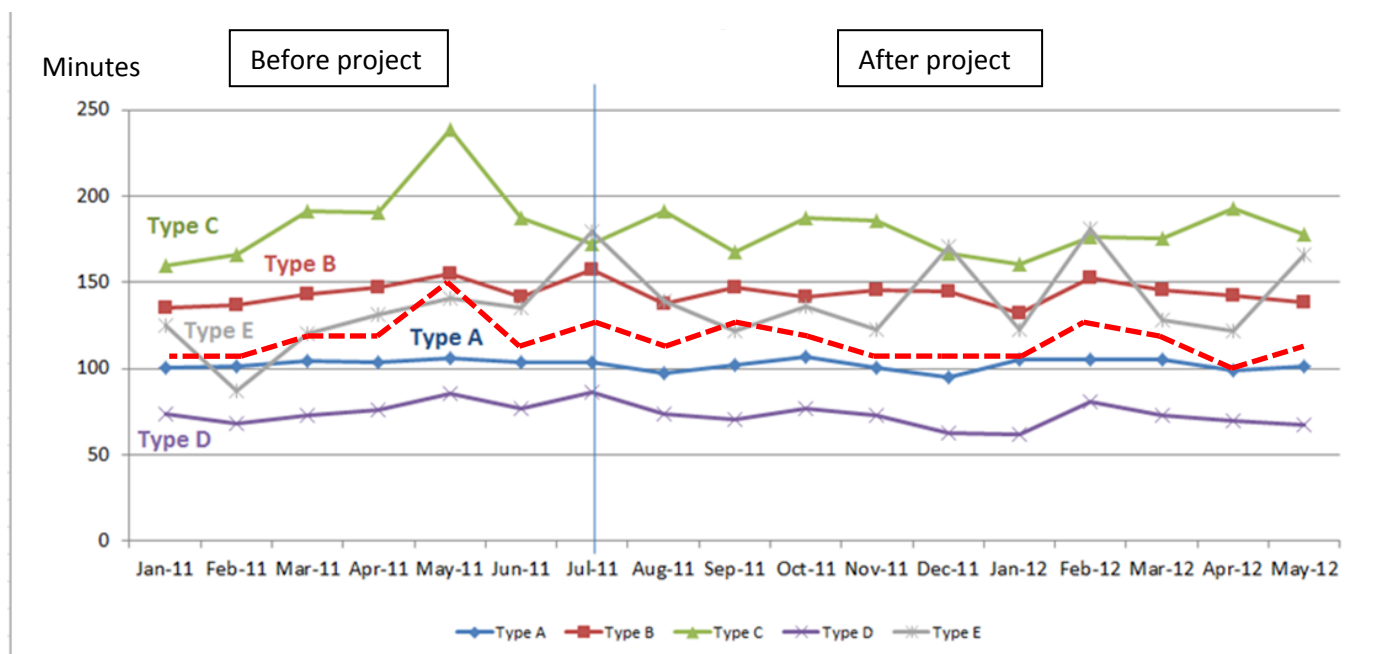

| Patient type                              | Type of visit                          | Average TAT before project (mins) (Jan 2011 – Jun 2011) | Average TAT post project (mins) (Jul 2011-May 2012) |
|-------------------------------------------|----------------------------------------|---------------------------------------------------------|-----------------------------------------------------|
| A                                         | Doctor consult only                    | 103                                                     | 102                                                 |
| B                                         | Doctor + 1 allied health consult       | 143                                                     | 144                                                 |
| C                                         | Doctor + 2 allied health consult       | 189                                                     | 178                                                 |
| D                                         | 1 allied health consult only           | 76                                                      | 72                                                  |
| E                                         | More than 1 allied health consult only | 123                                                     | 145                                                 |
| <b>OVERALL Turn Around Time - - - - -</b> |                                        | <b>108.23</b>                                           | <b>106.6</b>                                        |

**Figure 3: Run chart showing increase in percentage of patients seen by the doctor at DBC within 60 minutes from 80% to 84% after project implementation**

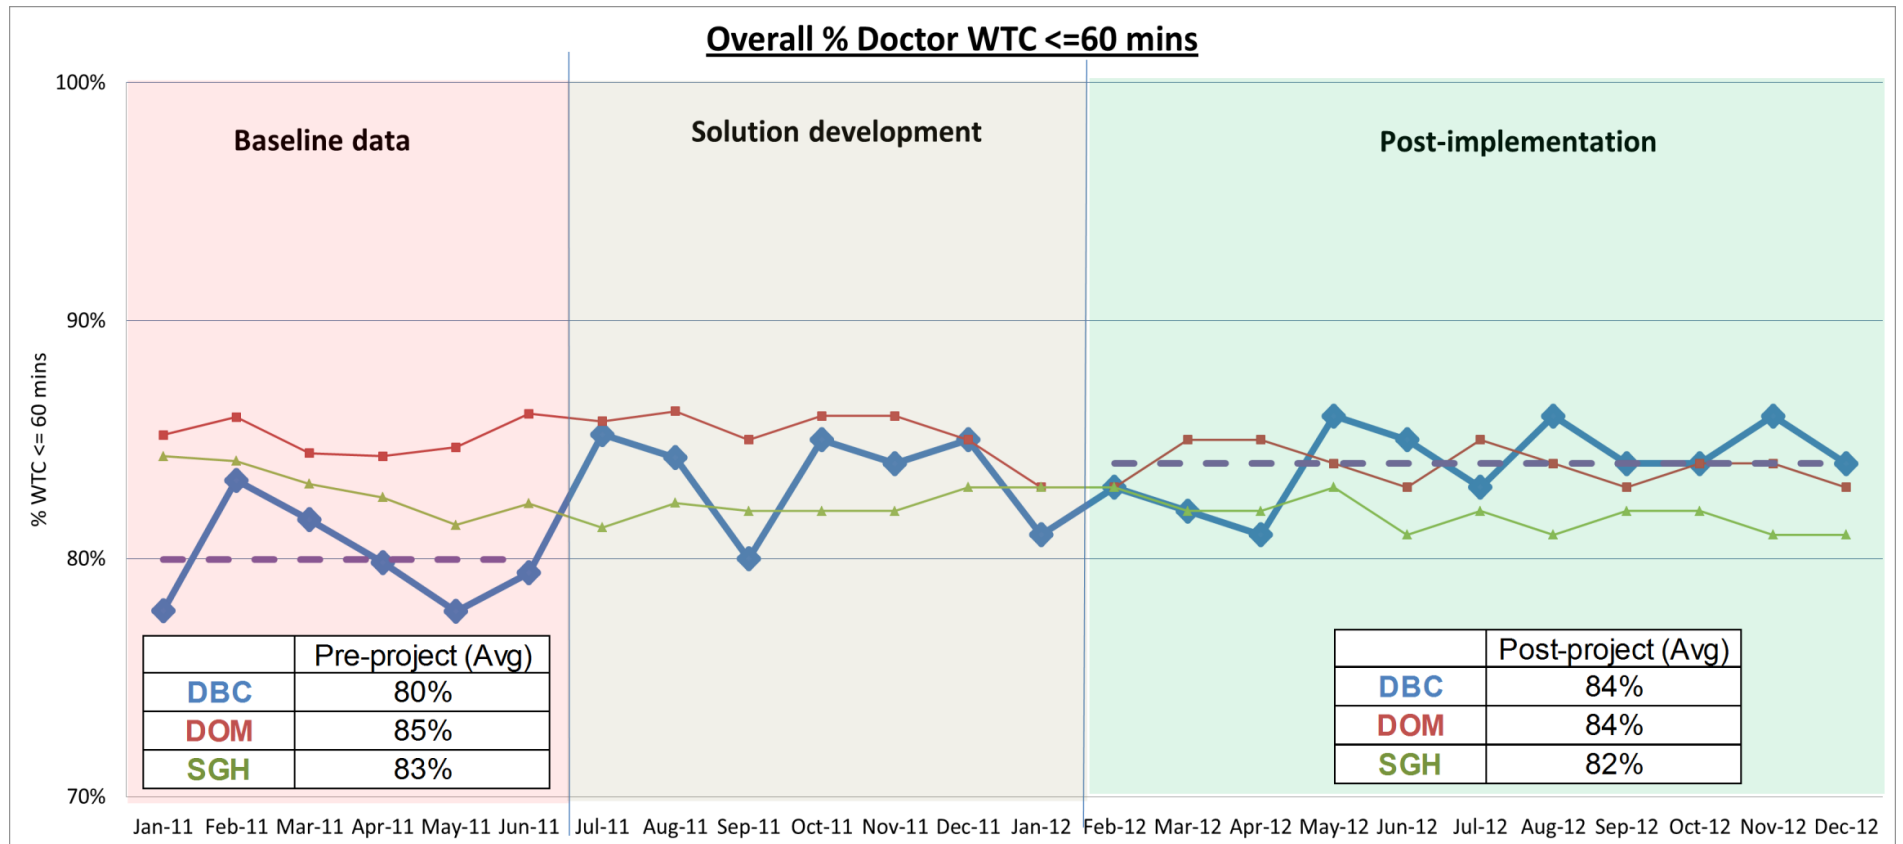

|            |                                          |
|------------|------------------------------------------|
| <b>DBC</b> | <b>SGH Diabetes Center</b>               |
| <b>DOM</b> | <b>SGH Division of Medicine Clinics</b>  |
| <b>SGH</b> | <b>SGH Specialist Outpatient Clinics</b> |

**Figure 4: The Outpatient Appointment Reminder System (OARS) reduced no show rates of new cases at DBC from 30.2% to 21.3%**

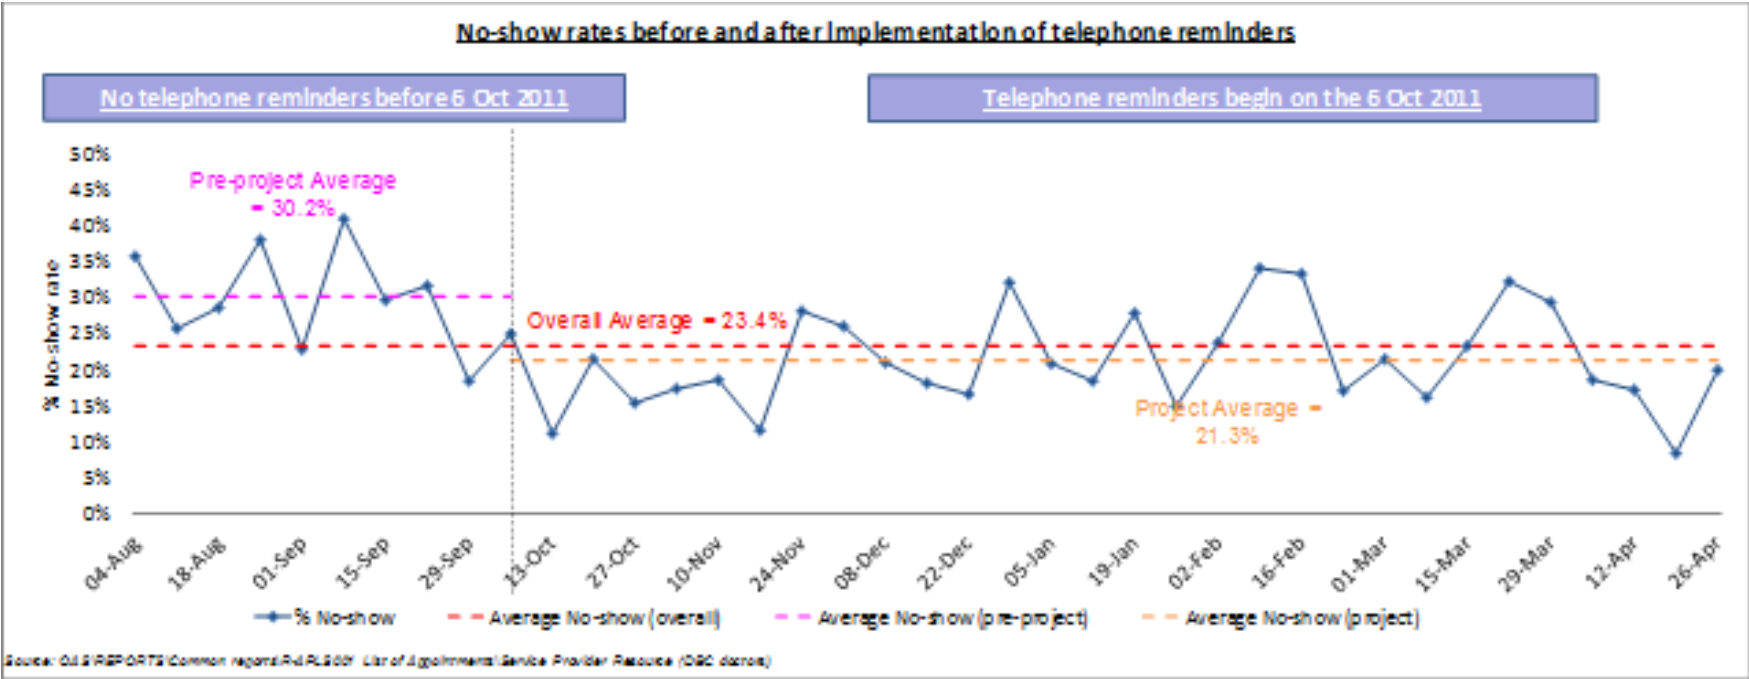

**Figure 5: Results showing: A. Overall reduction in waiting time (minutes) for bill payment at cashier after project implementation B. Reduction of waiting time (minutes) for bill payment at cashier during peak hours ( 11:00am to 1:30pm) after project implementation**

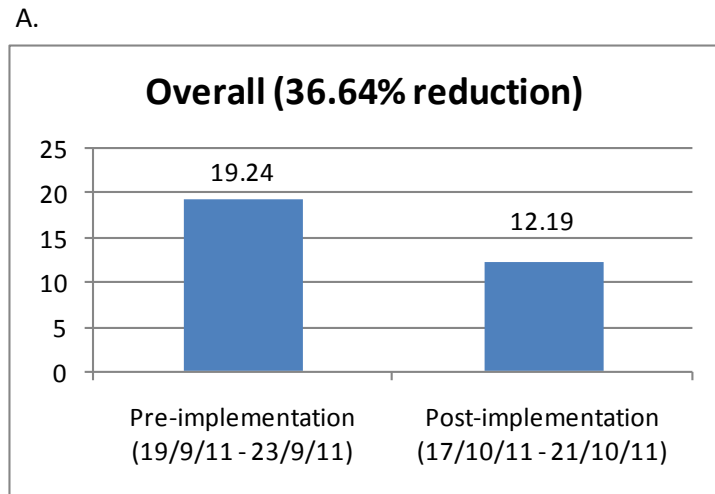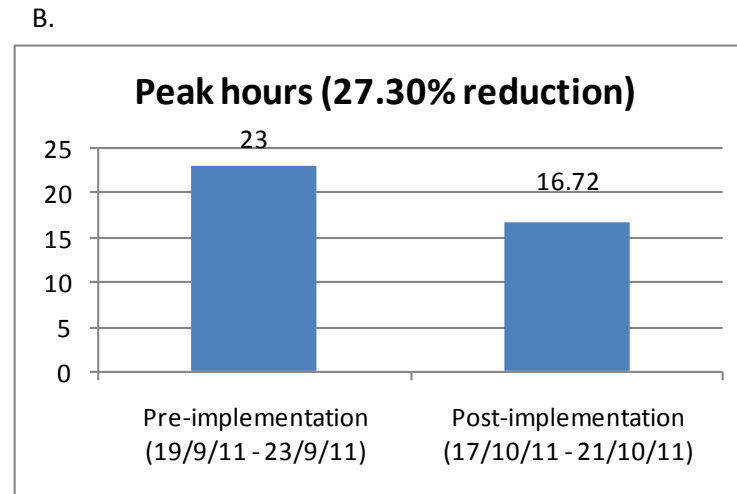

**Figure 6: Graph showing mean number of patient compliments before and after project.**  
**There was an increase from a mean number of 21.4 to 27.1 compliments /month after the project**

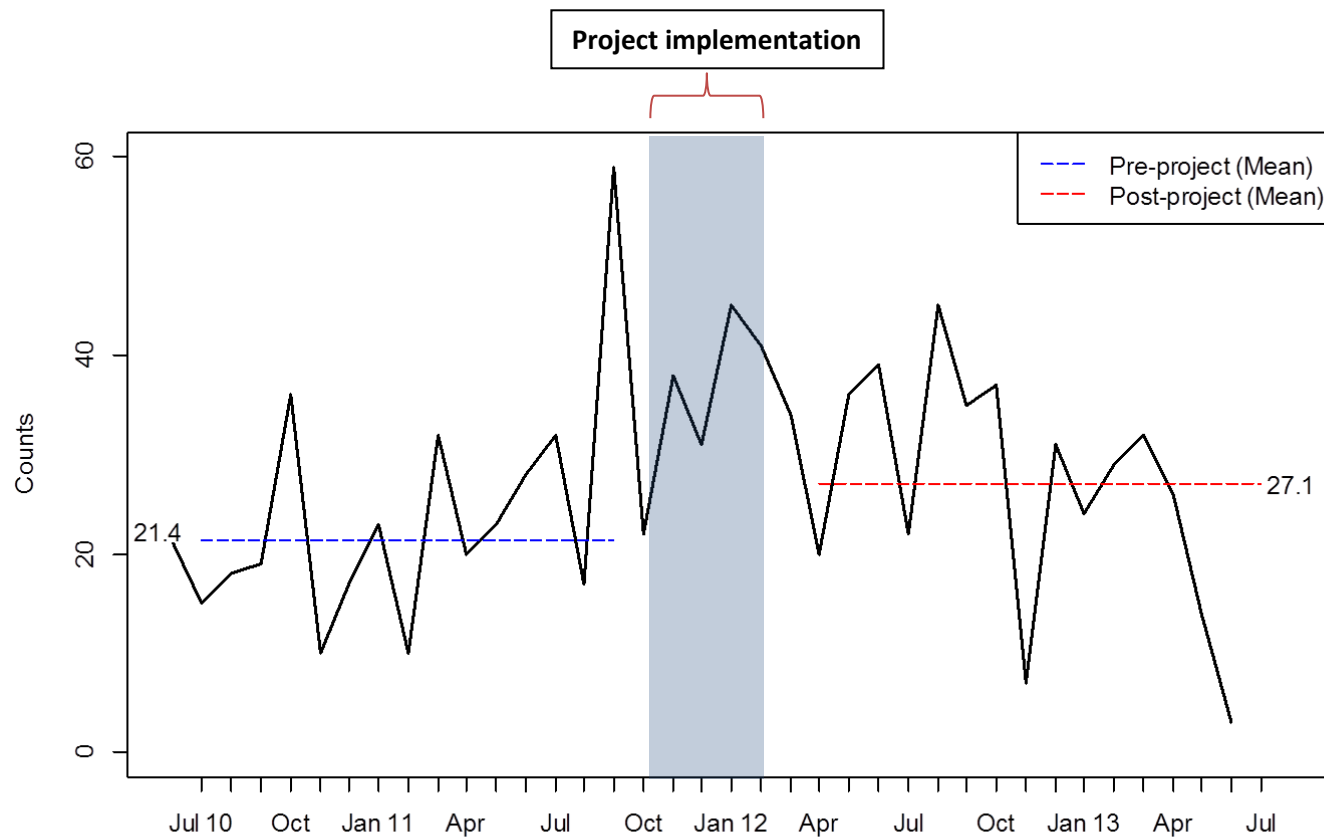

Supplement: bmjqir-2-u201918-w1006-s2.pdf [file bmjqir-2-u201918-w1006-s2.pdf]
